# Supplementary material
Source: PubMed Central journal article supplement (PMC6819017)

**Table S1. Interview guide**

| <b>Topic</b>                                                            | <b>Example questions/processes</b>                                                                                               |
|-------------------------------------------------------------------------|----------------------------------------------------------------------------------------------------------------------------------|
| 1) How participants found the intervention (From the feasibility study) | What do you feel you gained from taking part?                                                                                    |
|                                                                         | Content/format – relational aspects                                                                                              |
|                                                                         | What do you feel were the strengths of being part of a group/individual intervention?                                            |
|                                                                         | Did you have a preference of group or individual intervention beforehand?                                                        |
| 2) Eco-mapping                                                          | Explain to participant                                                                                                           |
|                                                                         | Identify social contacts people/groups before diagnosis                                                                          |
|                                                                         | Map relationship type, strength, type of support, direction, frequency, changes for each person/group identified                 |
|                                                                         | Repeat for after diagnosis                                                                                                       |
|                                                                         | Discuss any changes between the two eco-maps                                                                                     |
| 3) Degree of identification with social groups                          | Do you identify with and consider yourself to be a part of the groups you have identified?                                       |
|                                                                         | Are there any other social groups you consider yourself to be a part of ?                                                        |
| 4) Impact of social groups and changes on emotional adjustment/mood     | How does being a part of a group affect your mood?                                                                               |
|                                                                         | How have changes to your social groups affected your mood? (Draw back to any changes identified in the eco-mapping if necessary) |

**Figure S1. Fictional example of an eco-map**

Before diagnosis of MS

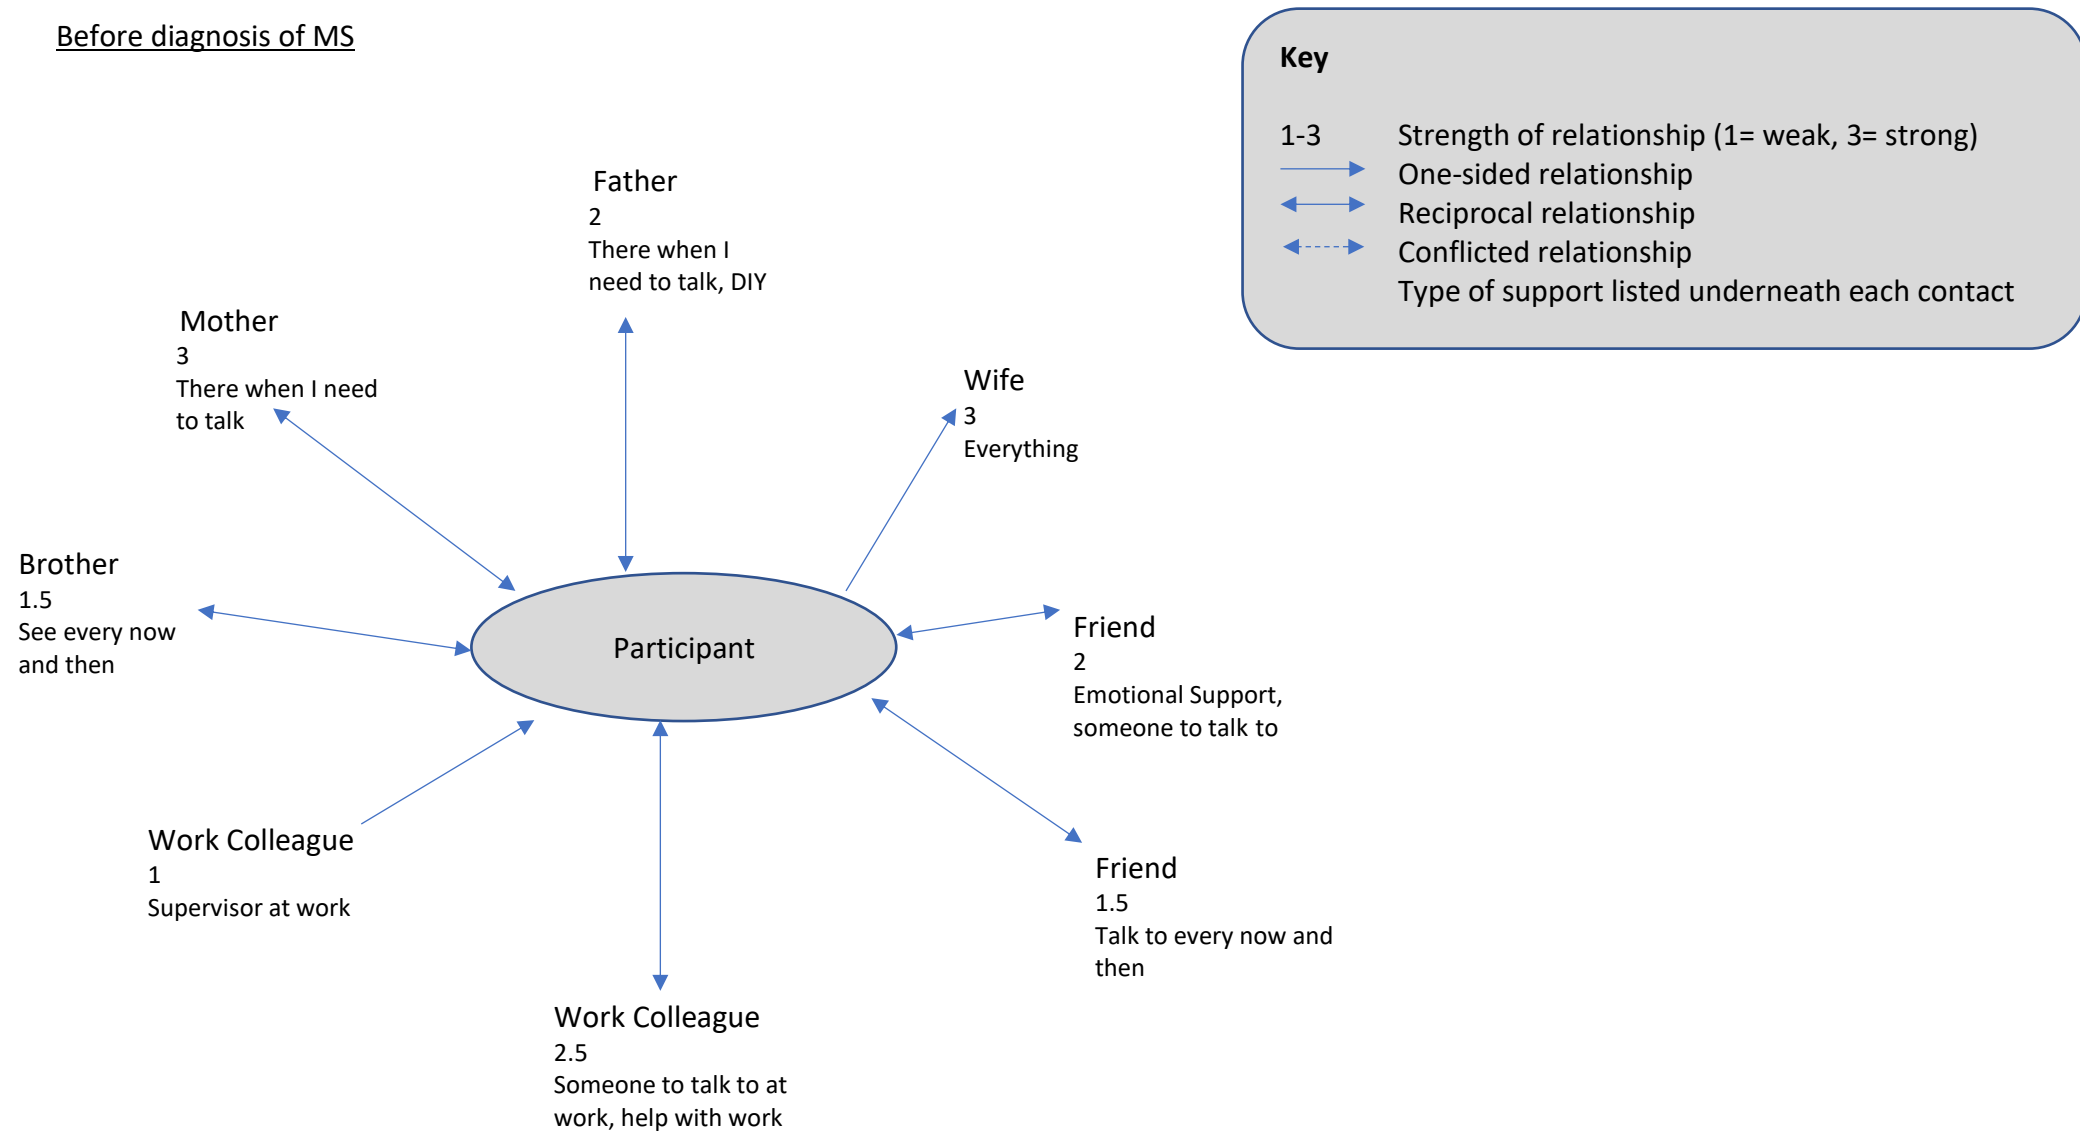

After diagnosis of MS

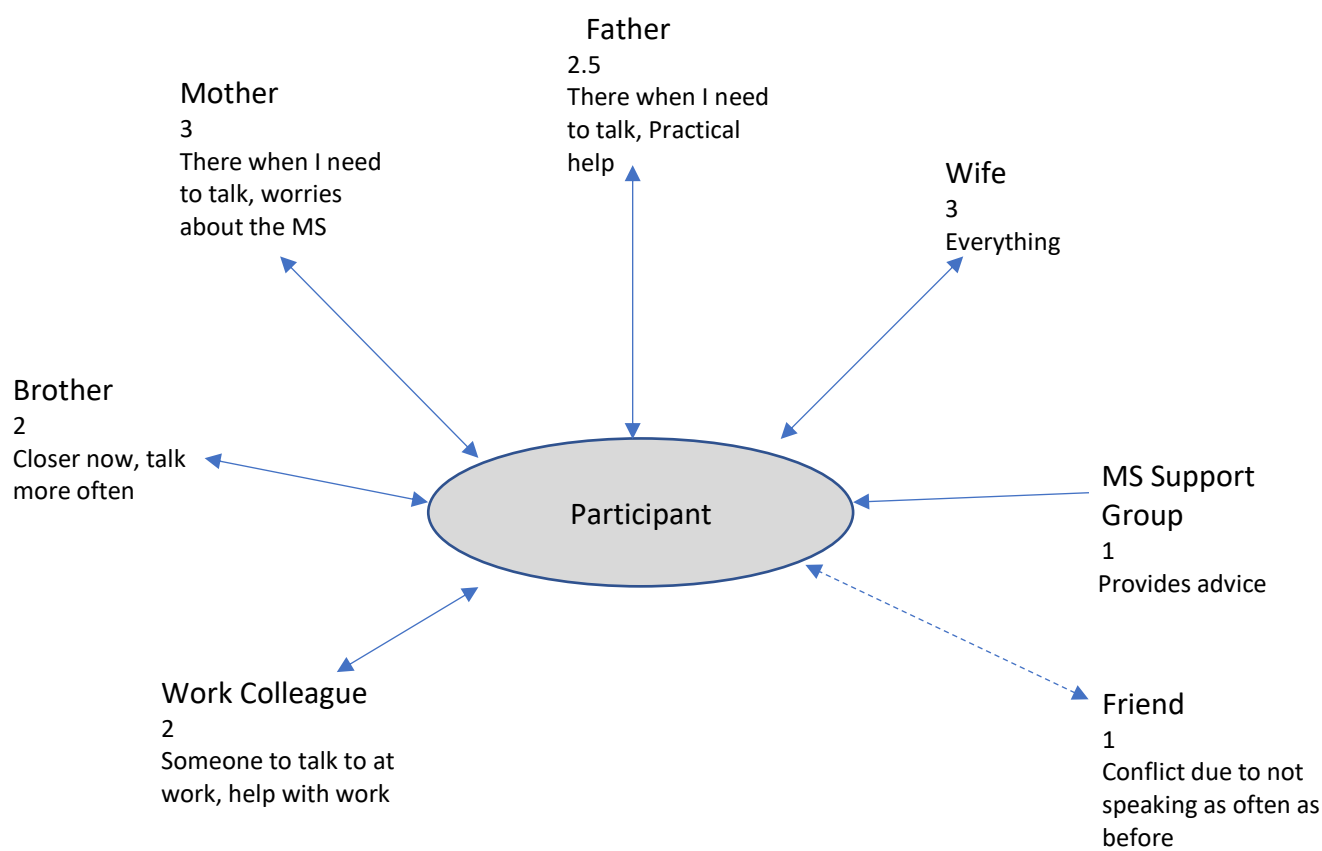

Supplement: i1537-2073-21-5-235_s01.pdf [file i1537-2073-21-5-235_s01.pdf]
